# Supplementary material for: Habits, Health and Environment in the Purchase of Bakery Products: Consumption Preferences and Sustainable Inclinations before and during COVID-19
Source: MDPI journal article supplement (doi:10.3390/foods12081661), 2023-04-16
Supplement: s1 [file s1]

## Supplementary files

**Table S1 .** Results of the factorial analysis. Total Variance Explained. Source: The authors

| Component | Initial Eigenvalues |               |              | Extraction Sums of Squared Loadings |               |              | Rotation Sums of Squared Loadings |               |              |
|-----------|---------------------|---------------|--------------|-------------------------------------|---------------|--------------|-----------------------------------|---------------|--------------|
|           | Total               | % of Variance | Cumulative % | Total                               | % of Variance | Cumulative % | Total                             | % of Variance | Cumulative % |
| 1         | 4.312               | 26.952        | 26.952       | 4.312                               | 26.952        | 26.952       | 2.803                             | 17.522        | 17.522       |
| 2         | 2.265               | 14.158        | 41.11        | 2.265                               | 14.158        | 41.11        | 2.422                             | 15.137        | 32.658       |
| 3         | 1.411               | 8.82          | 49.93        | 1.411                               | 8.82          | 49.93        | 2.25                              | 14.059        | 46.718       |
| 4         | 1.133               | 7.083         | 57.013       | 1.133                               | 7.083         | 57.013       | 1.647                             | 10.296        | 57.013       |
| 5         | 0.894               | 5.587         | 62.6         |                                     |               |              |                                   |               |              |
| 6         | 0.857               | 5.359         | 67.96        |                                     |               |              |                                   |               |              |
| 7         | 0.788               | 4.926         | 72.885       |                                     |               |              |                                   |               |              |
| 8         | 0.682               | 4.261         | 77.146       |                                     |               |              |                                   |               |              |
| 9         | 0.635               | 3.971         | 81.117       |                                     |               |              |                                   |               |              |
| 10        | 0.609               | 3.808         | 84.925       |                                     |               |              |                                   |               |              |
| 11        | 0.553               | 3.457         | 88.382       |                                     |               |              |                                   |               |              |
| 12        | 0.472               | 2.951         | 91.333       |                                     |               |              |                                   |               |              |
| 13        | 0.431               | 2.696         | 94.03        |                                     |               |              |                                   |               |              |
| 14        | 0.39                | 2.435         | 96.465       |                                     |               |              |                                   |               |              |
| 15        | 0.321               | 2.006         | 98.471       |                                     |               |              |                                   |               |              |
| 16        | 0.245               | 1.529         | 100          |                                     |               |              |                                   |               |              |

Extraction Method: Principal Component Analysis.

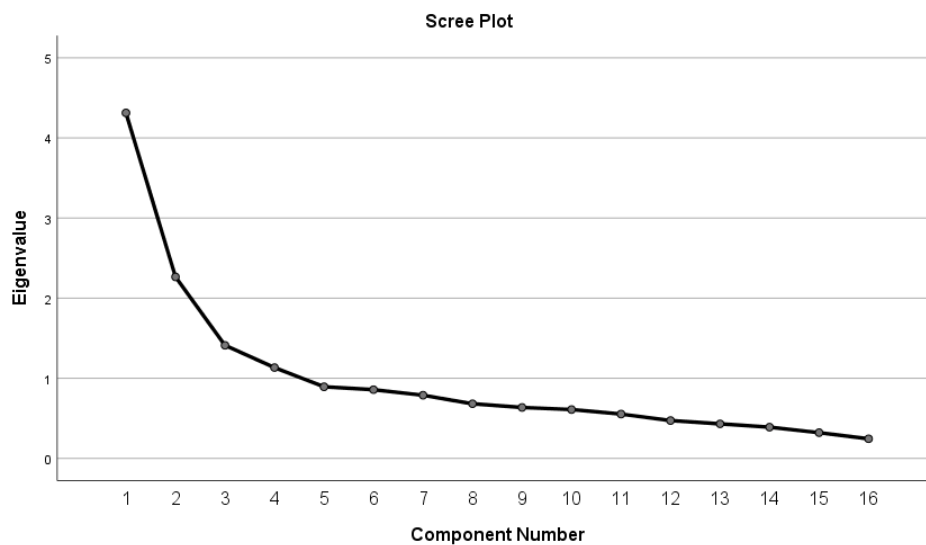

**Figure S1 .** Scree Plot of factorial analysis. Source: the authors
